# Supplementary material
Source: HighWire-hosted journal article supplement (http://www.qdcxjkg.com/highwire/filestream/113950/field_highwire_adjunct_files/1/EurRespJ_Supplemental_Table_revised.pdf)
Supplement: EurRespJ_Supplemental_Table_revised.pdf [file EurRespJ_Supplemental_Table_revised.pdf]

## Supplemental Table 1

### RESULTS

Table 1. Cytokines and chemokines in bronchoalveolar lavage fluid\*

| <i>Treatment</i> | <i>saline</i>        | <i>rhAPC 15 µg</i> |                   | <i>saline</i>        | <i>rhAPC 75 µg</i> |                    | <i>saline</i>           | <i>rhAPC 75 µg</i> |                    |
|------------------|----------------------|--------------------|-------------------|----------------------|--------------------|--------------------|-------------------------|--------------------|--------------------|
| <b>Challenge</b> | <b>LPS bilateral</b> |                    |                   | <b>LPS bilateral</b> |                    |                    | <b>saline bilateral</b> |                    |                    |
|                  |                      |                    | <i>P</i>          |                      |                    | <i>P</i>           |                         |                    | <i>P</i>           |
| <b>TNF-α**</b>   | 93.8 ± 34.1          | 125 ± 21.0         | <b>0.260</b>      | 12.3 ± 3.8           | 196 ± 56.6         | <b>&lt; 0.05*</b>  | 1.5 ± 0.8               | 1.4 ± 0.5          | <b>0.937</b>       |
| <b>IL-1β</b>     | 37.1 ± 14.3          | 56.3 ± 25.3        | <b>0.385</b>      | 10.3 ± 2.7           | 103 ± 30.6         | <b>0.052</b>       | 8.6 ± 2.1               | 17.4 ± 6.0         | <b>0.269</b>       |
| <b>IL-6</b>      | 1335 ± 316           | 2622 ± 439         | <b>&lt; 0.05*</b> | 345 ± 158            | 2268 ± 823         | <b>0.125</b>       | 42.4 ± 34.1             | 428 ± 320          | <b>0.315</b>       |
| <b>IL-12p40</b>  | 5183 ± 367           | 6857 ± 386         | <b>0.068</b>      | 6932 ± 946           | 5937 ± 1088        | <b>0.444</b>       | 7628 ± 744              | 6131 ± 863         | <b>&lt; 0.01**</b> |
| <b>IL-12p70</b>  | 2.9 ± 0.9            | 1.7 ± 0.3          | <b>0.374</b>      | 3.2 ± 0.4            | 2.9 ± 0.7          | <b>0.756</b>       | 2.2 ± 0.6               | 2.3 ± 0.5          | <b>0.843</b>       |
| <b>IL-16</b>     | 7.4 ± 4.4            | 8.8 ± 4.8          | <b>0.186</b>      | 4.3 ± 1.3            | 29.4 ± 11.9        | <b>0.129</b>       | 6.9 ± 3.4               | 7.3 ± 2.2          | <b>0.919</b>       |
| <b>IL-17</b>     | 0.8 ± 0              | 4.4 ± 2.7          | <b>0.270</b>      | 14.7 ± 6.3           | 6.5 ± 5.7          | <b>0.767</b>       | 17.6 ± 6.68             | 10.0 ± 5.2         | <b>0.487</b>       |
| <b>IL-21</b>     | 2.3 ± 0.8            | 2.8 ± 0.8          | <b>0.718</b>      | 2.3 ± 0.8            | 2.1 ± 0.9          | <b>0.900</b>       | 3.0 ± 1.2               | 6.1 ± 2.1          | <b>0.322</b>       |
| <b>IL-29</b>     | 30.0 ± 19.1          | 28.0 ± 13.2        | <b>0.771</b>      | 14.6 ± 7.1           | 59.8 ± 13.2        | <b>0.105</b>       | 13.4 ± 3.3              | 31.4 ± 11.9        | <b>0.245</b>       |
| <b>CCL2</b>      | 646 ± 196            | 1018 ± 255         | <b>0.250</b>      | 317 ± 238            | 1203 ± 344         | <b>0.118</b>       | 74 ± 74                 | 527 ± 525          | <b>0.423</b>       |
| <b>CCL3</b>      | 347 ± 99             | 551 ± 108          | <b>0.259</b>      | 113 ± 90             | 689 ± 246          | <b>0.153</b>       | 19 ± 17                 | 232 ± 149          | <b>0.248</b>       |
| <b>CCL4</b>      | 5998 ± 2751          | 7990 ± 3244        | <b>0.422</b>      | 721 ± 378            | 8617 ± 1016        | <b>&lt; 0.01**</b> | 1163 ± 1142             | 3224 ± 3198        | <b>0.422</b>       |
| <b>CCL8</b>      | 10.9 ± 3.8           | 27.8 ± 6.9         | <b>&lt; 0.05*</b> | 6.4 ± 3.8            | 46.3 ± 8.0         | <b>&lt; 0.05*</b>  | 4.0 ± 1.4               | 15.9 ± 10.7        | <b>0.294</b>       |
| <b>CCL14a</b>    | 52.6 ± 20.0          | 63.4 ± 14.9        | <b>0.541</b>      | 37.1 ± 7.8           | 113 ± 24           | <b>0.081</b>       | 86.9 ± 33.5             | 119 ± 57           | <b>0.489</b>       |
| <b>CCL15</b>     | 47.0 ± 18.1          | 47.6 ± 8.5         | <b>0.978</b>      | 31.9 ± 8.9           | 70.1 ± 18.8        | <b>0.177</b>       | 37.2 ± 4.7              | 64.9 ± 3.1         | <b>&lt; 0.05*</b>  |
| <b>CCL17</b>     | 1.1 ± 0.5            | 1.5 ± 0.4          | <b>0.454</b>      | 0.6 ± 0.2            | 1.8 ± 0.7          | <b>0.146</b>       | 2.5 ± 1.3               | 5.2 ± 2.9          | <b>0.254</b>       |
| <b>CCL19</b>     | 2.0 ± 1.2            | 1.7 ± 0.3          | <b>0.838</b>      | 1.5 ± 0.3            | 3.0 ± 1.0          | <b>0.272</b>       | 1.5 ± 0.4               | 1.8 ± 0.6          | <b>0.773</b>       |
| <b>CCL20</b>     | 182 ± 125            | 138 ± 80           | <b>0.409</b>      | 26.6 ± 13.0          | 308 ± 97           | <b>0.078</b>       | 8.9 ± 5.7               | 130 ± 75           | <b>0.182</b>       |
| <b>CCL21</b>     | 8.7 ± 3.1            | 18.8 ± 6.6         | <b>0.064</b>      | 10.6 ± 10.6          | 39.1 ± 10.1        | <b>0.159</b>       | 6.8 ± 6.7               | 29.8 ± 17.4        | <b>0.191</b>       |

|                  |              |              |                    |             |               |                    |             |             |              |
|------------------|--------------|--------------|--------------------|-------------|---------------|--------------------|-------------|-------------|--------------|
| <b>CCL24</b>     | 544 ± 623    | 797 ± 397    | <b>0.215</b>       | 386 ± 303   | 597 ± 525     | <b>0.419</b>       | 380 ± 192   | 534 ± 386   | <b>0.522</b> |
| <b>CXCL1</b>     | 5203 ± 1183  | 4584 ± 972   | <b>0.622</b>       | 1926 ± 237  | 3494 ± 988    | <b>0.223</b>       | 1431 ± 470  | 3009 ± 1118 | <b>0.273</b> |
| <b>CXCL5</b>     | 150 ± 89     | 170 ± 54     | <b>0.782</b>       | 124 ± 111   | 529 ± 210     | <b>0.232</b>       | 5.1 ± 2.2   | 7.0 ± 4.1   | <b>0.391</b> |
| <b>CXCL6</b>     | 22.0 ± 4.6   | 44.6 ± 4.9   | <b>&lt; 0.01**</b> | 89.6 ± 60.0 | 115 ± 49      | <b>0.486</b>       | 48.4 ± 11.5 | 53.6 ± 8.2  | <b>0.583</b> |
| <b>CXCL7</b>     | 22.4 ± 7.8   | 116 ± 62     | <b>0.245</b>       | 37.9 ± 18.8 | 111 ± 26      | <b>0.075</b>       | 135 ± 96    | 164 ± 116   | <b>0.301</b> |
| <b>CXCL8</b>     | 1551 ± 302   | 2447 ± 642   | <b>0.287</b>       | 428 ± 215   | 1967 ± 832    | <b>0.174</b>       | 99.3 ± 70.6 | 834 ± 639   | <b>0.335</b> |
| <b>CXCL9</b>     | 16.8 ± 6.0   | 24.8 ± 6.7   | <b>0.380</b>       | 23.1 ± 9.1  | 107 ± 42      | <b>0.092</b>       | 23.8 ± 5.0  | 50.6 ± 20.7 | <b>0.235</b> |
| <b>CXCL10</b>    | 21665 ± 4213 | 27558 ± 7315 | <b>0.453</b>       | 3937 ± 1985 | 30394 ± 10488 | <b>0.110</b>       | 743 ± 415   | 3641 ± 2237 | <b>0.221</b> |
| <b>CXCL11</b>    | 16.8 ± 4.1   | 25.3 ± 10.3  | <b>0.412</b>       | 5.6 ± 3.1   | 47.2 ± 14.7   | <b>0.074</b>       | 1.1 ± 0.4   | 7.2 ± 5.4   | <b>0.307</b> |
| <b>CXCL12a+b</b> | 35.0 ± 9.0   | 41.4 ± 15.4  | <b>0.772</b>       | 53.5 ± 19.8 | 26.0 ± 0      | <b>0.259</b>       | 50.3 ± 21.5 | 41.4 ± 15.4 | <b>0.652</b> |
| <b>M-CSF</b>     | 283 ± 58     | 335 ± 84     | <b>0.284</b>       | 139 ± 53    | 694 ± 192     | <b>0.101</b>       | 67.7 ± 39.8 | 379 ± 202   | <b>0.180</b> |
| <b>G-CSF</b>     | 186 ± 108    | 406 ± 183    | <b>0.157</b>       | 10.8 ± 4.4  | 840 ± 527     | <b>0.214</b>       | 4.2 ± 3.9   | 306 ± 222   | <b>0.268</b> |
| <b>TRAIL</b>     | 9.9 ± 5.7    | 11.6 ± 3.2   | <b>0.627</b>       | 4.3 ± 0.7   | 19.0 ± 2.2    | <b>&lt; 0.01**</b> | 8.3 ± 3.1   | 15.9 ± 7.0  | <b>0.291</b> |

\* IL-10, IL-11, IL-20, IL-23, IL-26A, IL-33, CCL1, CCL13, CCL26, CCL27, CXCL13, XCL1, LIF, TPO, TSLP and SCF were below detection limits in all BALF samples.

\*\* All values are in pg/mL
